# Supplementary material for: The Molecular Bases of the Interaction between a Saponin from the Roots of Gypsophila paniculata L. and Model Lipid Membranes
Source: MDPI journal article supplement (doi:10.3390/ijms23063397), 2022-03-21
Supplement: s1 [file s1]

# Supplementary Materials

## **The molecular bases of the interaction between a saponin from the roots of *Gypsophila paniculata* L. and model lipid membranes**

Beata Korchowiec<sup>1,\*</sup>, Jacek Korchowiec<sup>1</sup>, Klaudia Kwiecińska<sup>1</sup>, Reneta Gevrenova<sup>2</sup>, Sabine Bouguet-Bonnet<sup>3</sup>, Cheng Deng<sup>3</sup>, Max Henry<sup>4</sup>, Ewa Rogalska<sup>4</sup>

<sup>1</sup>*Faculty of Chemistry, Jagiellonian University, ul. Gronostajowa 2, 30-387 Krakow, Poland*

<sup>2</sup>*Department of Pharmacognosy, Faculty of Pharmacy, Medical University-Sofia, 2 Dunav Str., 1000 Sofia, Bulgaria*

<sup>3</sup>*Université de Lorraine and CNRS, UMR 7053 L2CM, F-54000 Nancy, France*

<sup>4</sup>*SRSMC, UMR 7565, CNRS-Université de Lorraine, Boulevard des Aiguillettes, 54506 Vandœuvre-Lès-Nancy, France*

\*Corresponding author: (BK) E-mail: [bkorch@chemia.uj.edu.pl](mailto:bkorch@chemia.uj.edu.pl); [orcid.org/0000-0003-3950-7514](https://orcid.org/0000-0003-3950-7514). Telephone: +48 (12) 686 25 16. Fax: +48 (12) 686 27 50.

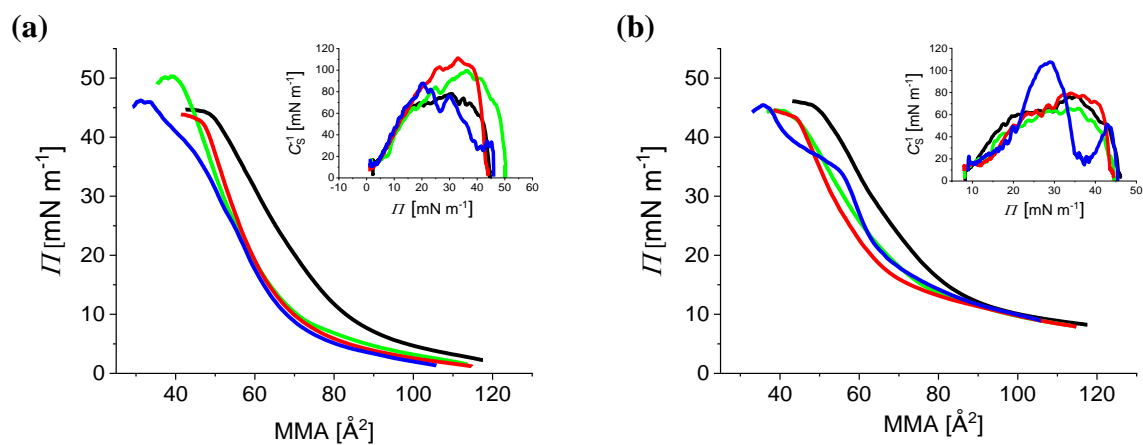

**Figure S1.** Compression isotherms of SM/POPC (black), SM/POPC/CHOL 10 mol% (green), SM/POPC/CHOL 30 mol% (red), and SM/POPC/CHOL 50 mol% (blue) mixed films spread on GOTCAB solution subphase: 8 (a), and 80 mg L<sup>-1</sup> (b). Inset:  $C_s^{-1}$ – $\Pi$  dependency.  $T = 20$  °C.

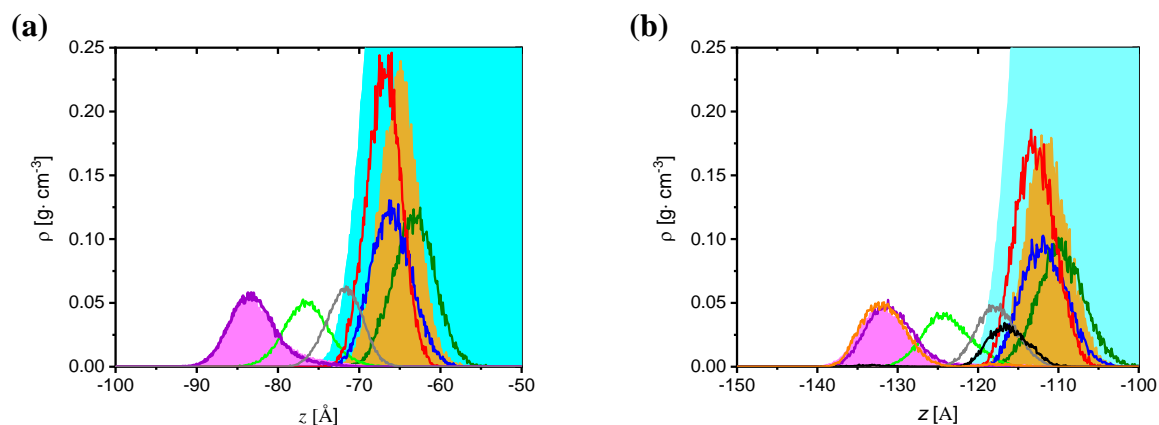

**Figure S2.** Partial density plots at the interface of SM/POPC (a) and SM/POPC/CHOL 30 mol% (b) monolayers. Color code: cyan area: water; magenta area: terminal  $\text{CH}_3$  in the POPC lateral chains; violet line: terminal  $\text{CH}_3$  in the SM lateral chains; orange line: terminal  $\text{CH}_3$  in the CHOL lateral chain; green line:  $\text{C}=\text{C}$  in POPC; gray line:  $\text{C}=\text{C}$  in SM; orange area:  $\text{PO}_4$  in POPC; red line:  $\text{PO}_4$  in SM; black line:  $\text{OH}$  in CHOL; olive line:  $\text{N}(\text{CH}_3)_3$  in POPC; blue line:  $\text{N}(\text{CH}_3)_3$  in SM.

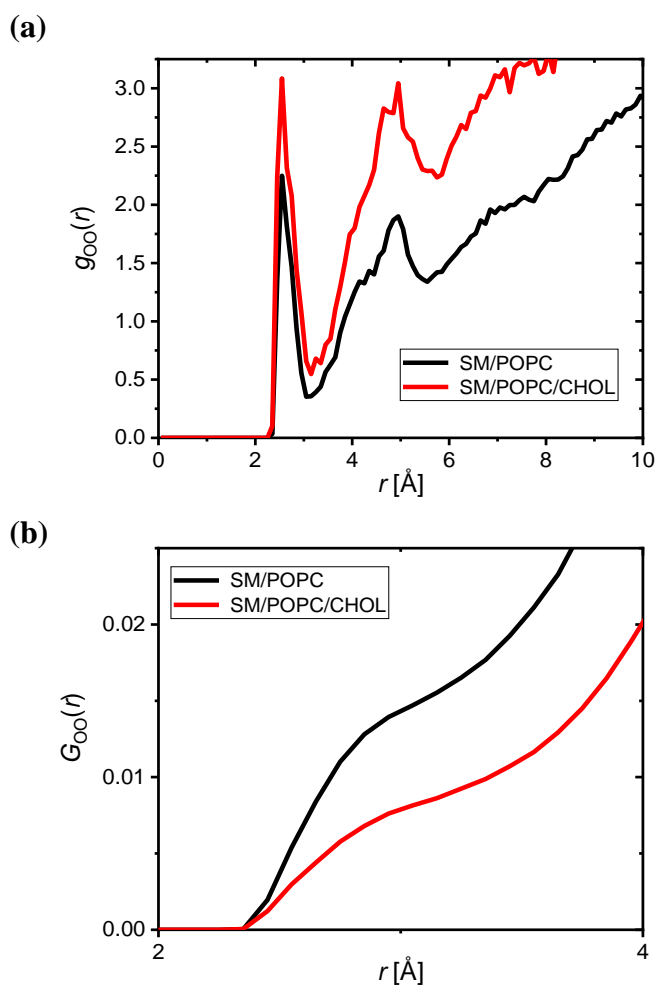

**Figure S3.** Radial pair distribution function,  $g_{OO}(r)$ , (a) and integral over radial pair distribution function,  $G_{OO}(r)$ , (b) for hydroxyl oxygen atoms of glycone moiety and oxygen atoms of  $\text{PO}_4$  residues. The black and red curves correspond to SM/POPC and SM/POPC/CHOL, respectively.

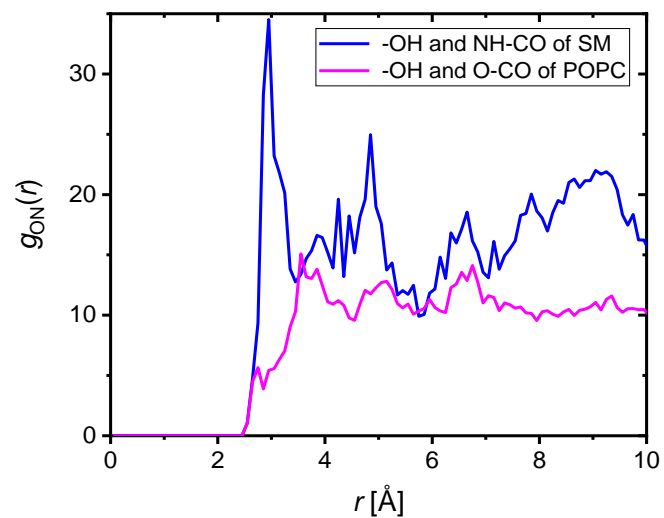

**Figure S4.** Radial pair distribution function between hydroxyl oxygen atoms of GOTCAB aglycone moiety and nitrogen -NH- unit of SM,  $g_{ON}(r)$ . Only GOTCAB molecules penetrating hydrophobic part of the monolayer were considered in the calculations.

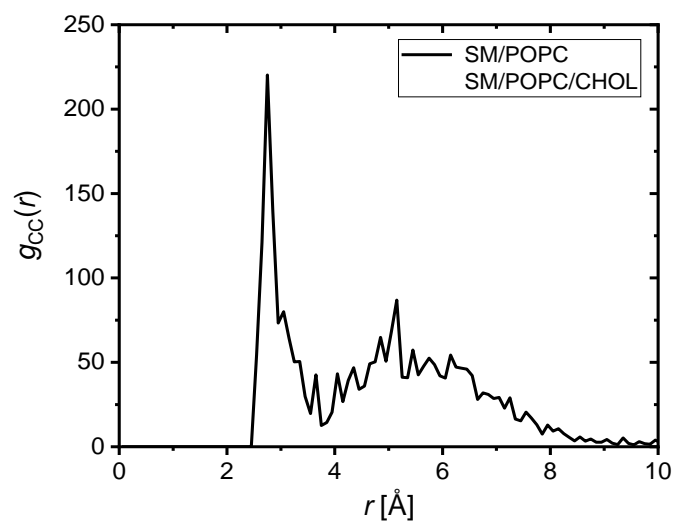

**Figure S5.** Radial pair distribution function between hydroxyl oxygen atoms of GOTCAB aglycone moiety and oxygen  $\text{-NHCO-}$  unit [ $g_{OO}(r)$ ] of SM. Only GOTCAB molecules penetrating hydrophobic part of the monolayer were taken into account in the calculations.

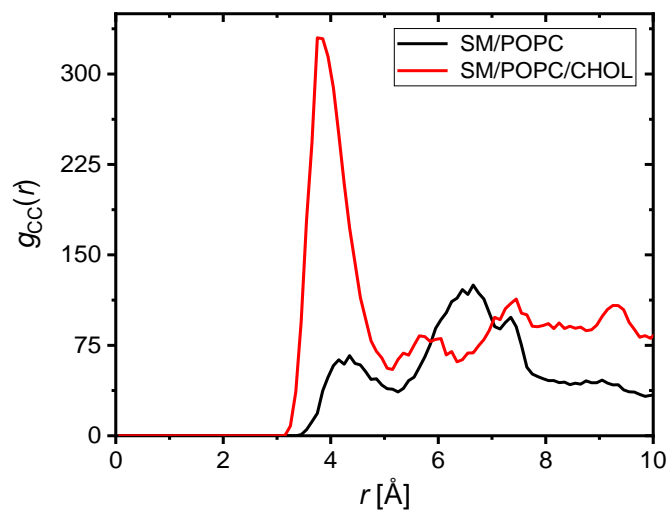

**Figure S6.** Radial pair distribution functions for methyl carbon atoms of aglycone moiety and methyl carbon atoms of rhamnose and fucose residues. The black and red curves correspond to SM/POPC and SM/POPC/CHOL monolayer systems, respectively.
